# Supplementary material for: Exploratory studies of a multidimensionally talented simple MnII-based porous network: selective “turn-on” recognition @ cysteine over homocysteine with an indication of cystinuria and renal dysfunction
Source: Royal Society of Chemistry journal article supplement (doi:10.1039/d0nj02265a), 2020-01-01
Supplement: d0nj02265a1.pdf [file d0nj02265a1.pdf]

## Supporting Information

### Exploratory studies of a multidimensionally talented Simple Mn<sup>II</sup>-based porous network : Selective “turn-on” recognition @ Cysteine over homocysteine with an indication of cystinuria and renal dysfunction

Sourav Bej<sup>ab</sup>, Abhijit Hazra<sup>ab</sup>, Riyanka Das<sup>ab</sup>, Sourav Kr. Saha<sup>ac</sup>, Monserrat Corbella<sup>d</sup> and Priyabrata Banerjee<sup>ab\*</sup>

a. Surface Engineering & Tribology Group, CSIR-Central Mechanical Engineering Research Institute, Mahatma Gandhi Avenue, Durgapur, 713209, India.

E-mail: pr\_banerjee@cmeri.res.in, priyabrata\_banerjee@yahoo.co.in; Web: www.cmeri.res.in, www.priyabratabanerjee.in; Tel: +91-9433814081

b. Academy of Scientific and Innovative Research (AcSIR), AcSIR Headquarters CSIR-HRDC Campus, Postal Staff College Area, Sector 19, Kamla Nehru Nagar, Ghaziabad – 201002, Uttar Pradesh, India

c. Present address: Faculty of Engineering, Hokkaido University, Kita-13, Nishi-8, Kita-ku, Sapporo, Hokkaido 060-8628, Japan

d. Department of Inorganic Chemistry, University of Barcelona, Barcelona, Spain.

| Sl. No. | Description                                                                                                                                                  | Entry               |
|---------|--------------------------------------------------------------------------------------------------------------------------------------------------------------|---------------------|
| 1       | Propagation of <b>PCP-1</b> along <i>a</i> , <i>b</i> , <i>c</i> -axes                                                                                       | Fig. S1             |
| 2       | Powder XRD (PXRD) studies of <b>PCP-1</b>                                                                                                                    | Fig. S2             |
| 3       | Thermo Gravimetric Analysis                                                                                                                                  | Fig. S3             |
| 4       | FESEM images of MOF, <b>PCP-1</b>                                                                                                                            | Fig. S4             |
| 5       | HRTEM images along with element map of <b>PCP-1</b>                                                                                                          | Fig. S5 & Fig. S6   |
| 6       | Absorption spectra of PCP-1, PCP-1+Cys & PCP-1+Hcy                                                                                                           | Fig. S7             |
| 7       | EDX mapping images of the Oxygen, Sulphur, Nitrogen, Manganese, Carbon atoms of <b>PCP-1</b> & FTIR spectra of <b>PCP-1</b> after interacting with Biothiols | Fig. S8             |
| 8       | FESEM images of the <b>PCP-1</b> before & after interaction with biothiols                                                                                   | Fig. S9             |
| 9       | LOD calculations for Cysteine & Homocysteine                                                                                                                 | Fig. S10            |
| 10      | B-H plot for determining association constant                                                                                                                | Fig. S11            |
| 11      | Chemical diagram of biothiols                                                                                                                                | Fig. S12            |
| 12      | Time-correlated single photon counting                                                                                                                       | Fig. S13            |
| 13      | UV-Vis spectrum of fluorophoric unit of <b>PCP-1</b> obtained from TD-DFT                                                                                    | Table S1 & Fig. S14 |

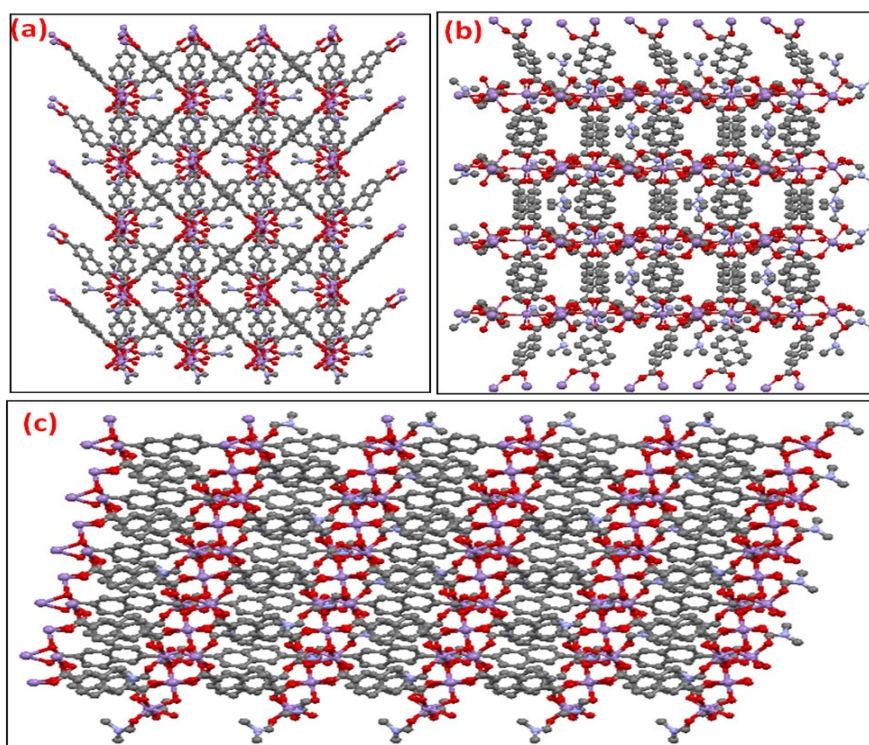

**Fig. S1** The propagation of the 3D network of **PCP-1** along the view point of (a) *a*-, (b) *b*- and (c) *c*-axis.

## PXRD

The powder X-ray diffraction (PXRD) patterns were measured using a Bruker AXS (D8)PXRD instrument. The crystallinity of the **PCP-1** was confirmed by low angle (in the range of 5 to 50  $2\theta$  value with the scan rate 0.5) PXRD analysis. PXRD patterns of the MOF, **PCP-1** matches well with the simulated PXRD pattern of **PCP-1**, indicating that the topology is retained and thus all members are isostructural.

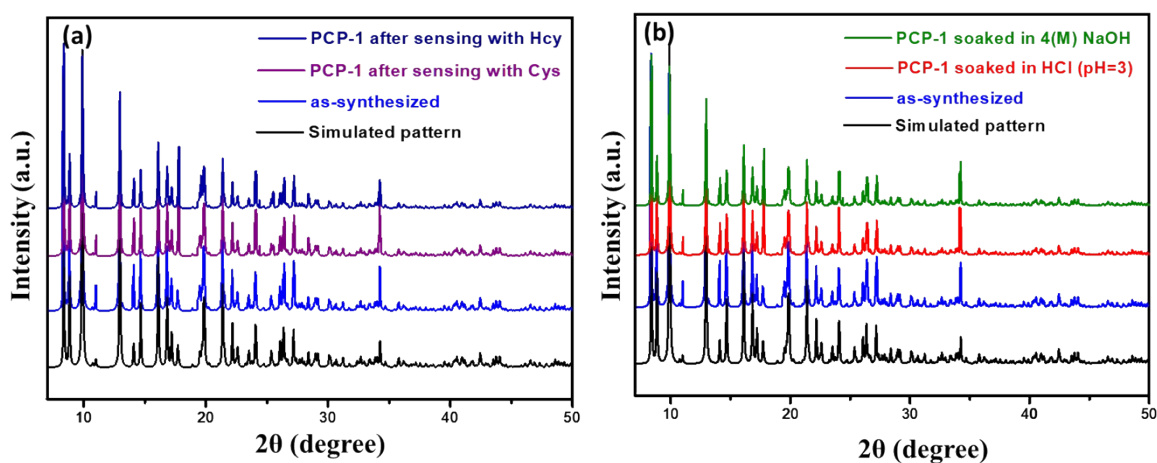

**Fig. S2** (a) Experimental and simulated PXRD patterns of the as-synthesised MOF (**PCP-1**) along with its stability after sensing of biothiols (b) Stability of the **PCP-1** in different harsh conditions

### Thermogravimetric analysis and framework rigidity

To characterize the thermal stability and thermal behaviour of **PCP-1**, Thermogravimetric Analysis (TGA) was carried out. TGA was conducted in nitrogen atmosphere from 0°C to 800°C with a heating rate of 5°C/min. The results obtained from TGA analysis was depicted in **Figure S3**. It was observed that a mass loss of ~ 26.8 % till ~275 °C corresponding to the loss of the encapsulated guest solvent molecules, DMF (calcd. 26.58%). Thus, the desolvated MOF is quite stable upto ~275 °C. Beyond this, the MOF shows gradual decomposition.

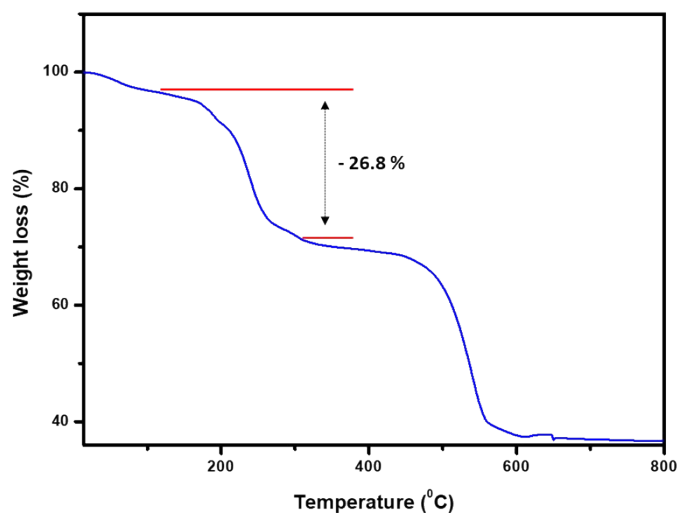

**Fig. S3** TGA curve of MOF, **PCP-1** in nitrogen gas medium with a heating rate of 5°C/min.

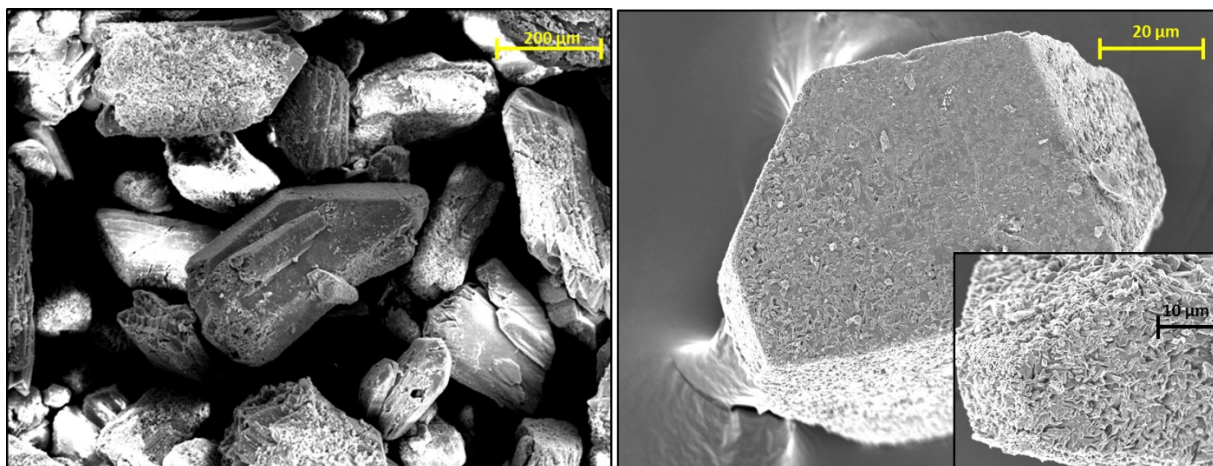

**Fig. S4** FESEM images of MOF, **PCP-1** prepared by conventional solvothermal method.

### HRTEM analysis:

High resolution transmission electron microscopy (HRTEM) (FEI, TF30, ST) was operated at 300 kV. The TF30 microscope was equipped with high-angle annular dark field (HAADF) detector (Fischione, model: 3000) and a scanning unit. Energy-filtered TEM (EFTEM) studies were accomplished using a post column imaging filter (Quantum SE, Model 963) from Gatan Inc.

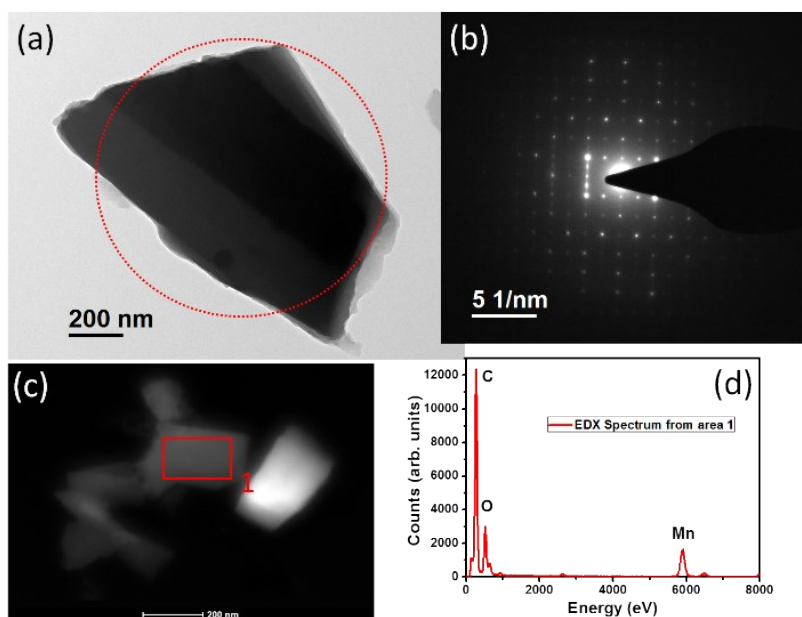

**Fig. S5** (a) TEM image of MOF, **PCP-1**, (b) Electron diffraction pattern of the analysed porous material (c) STEM-HAADF image and (d) EDX spectrum taken from the region marked by 1

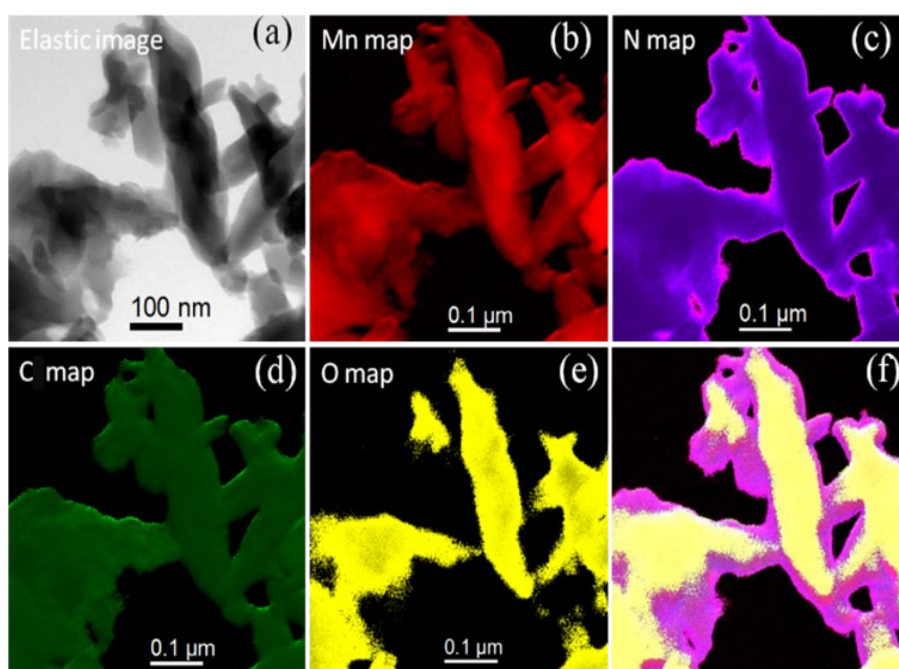

**Fig. S6** EFTEM images of **PCP-1**. (a) elastic (zero-loss) image, (b) chemical map of Mn (red), (c) chemical map of N (blue), (d) chemical map of C (green), (e) chemical map of O (yellow) and (f) composite map.



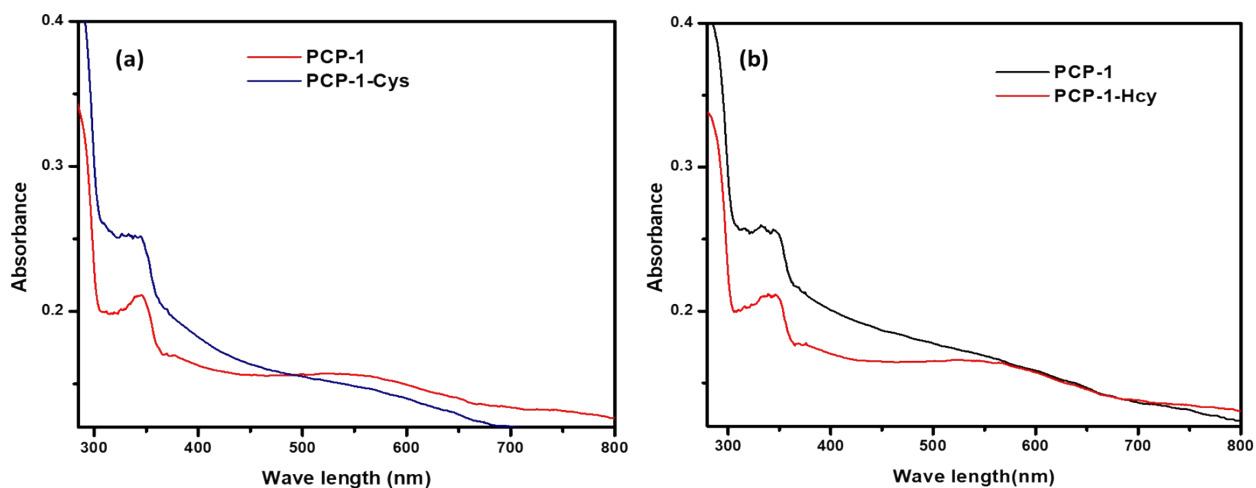

**Fig. S7** (a) Absorption spectra of PCP-1 & PCP-1+Cys (b) Absorption spectra of PCP-1 & PCP-1+Hcy

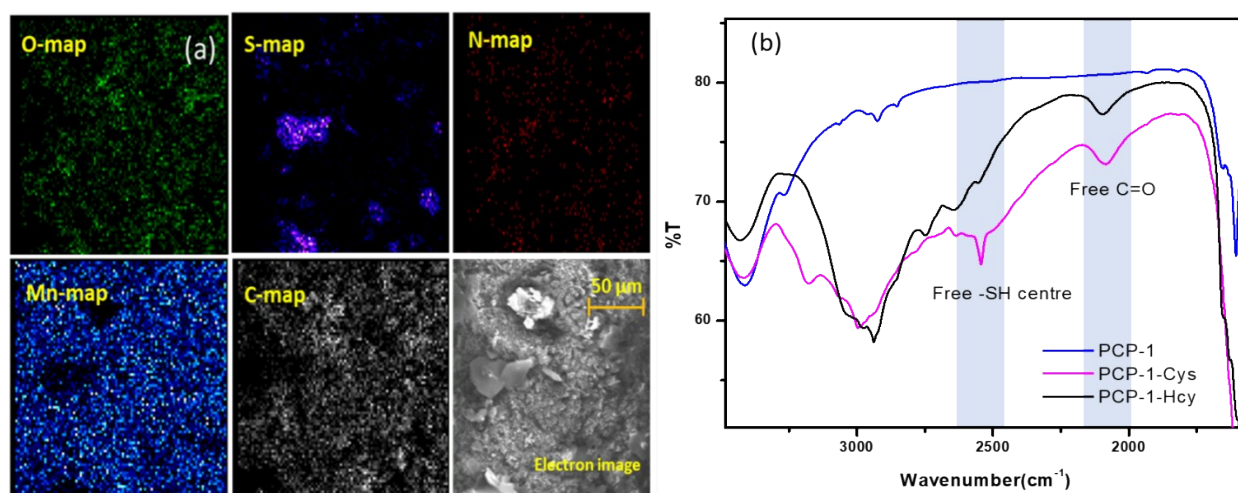

**Fig. S8** (a) EDX mapping images of the Oxygen, Sulphur, Nitrogen, Manganese, Carbon atoms of **PCP-1** after interaction with biothiol (b) FTIR spectra of **PCP-1** after interacting with Biothiols

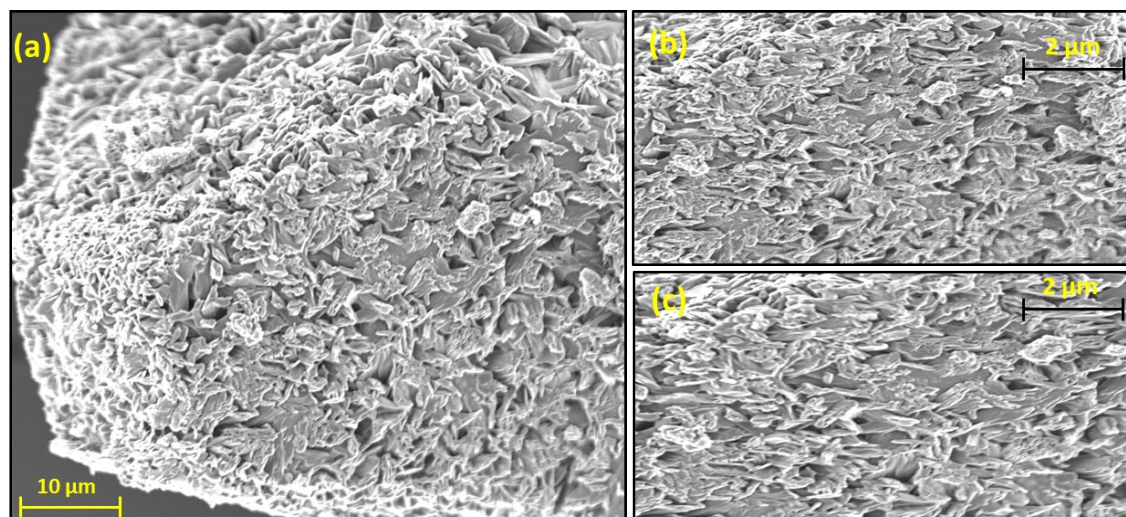

**Fig. S9** FESEM images of **PCP-1** (a) before interaction with biothiols (b) & (c) after interaction with Cys & Hcy respectively

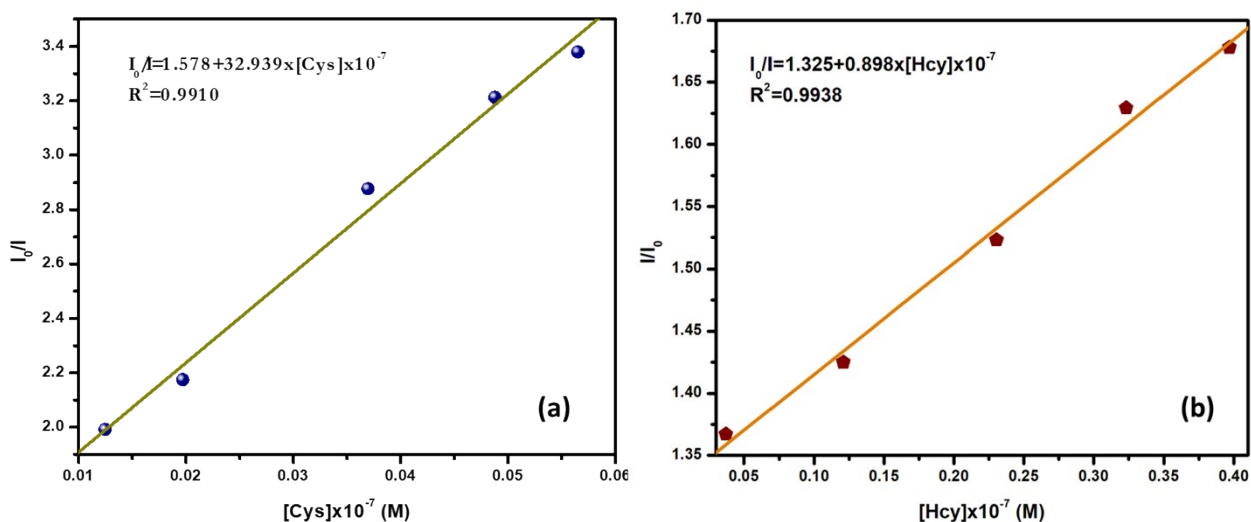

**Fig. S10** Plot of ( $I_0/I$ ) vs concentration of (a) Cysteine & (b) Homocysteine for the determination of limit of detection (LOD)

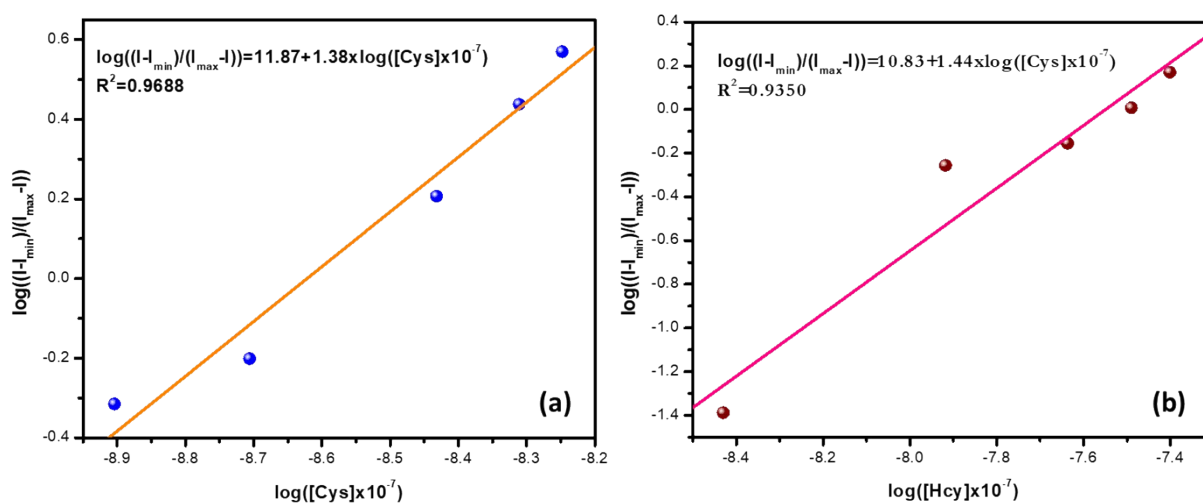

**Fig. S11** Plot for the determination of association constant ( $K_a$ ) by PCP-1 with biothiols (a) Cys & (b) Hcy

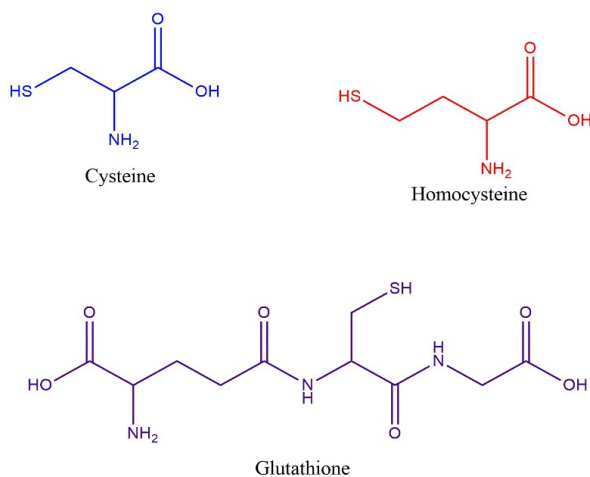

**Fig. S12** Chemical diagram of biothiols.

## Time-correlated single photon counting

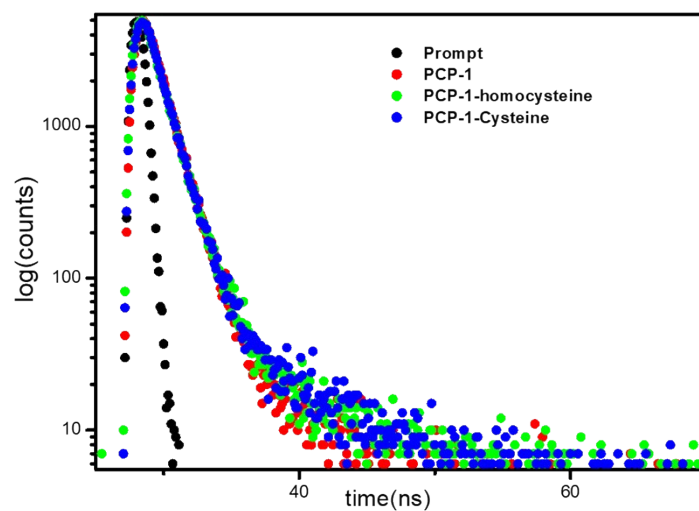

**Fig. S13** Exited state life time parameters of **PCP-1** & **PCP-1+** biothiols

**Table S1.** UV-Vis spectral data of fluorophoric unit of **PCP-1** obtained from TD-DFT

| Frequency    | Oscillator strength |
|--------------|---------------------|
| 256.16103422 | 0.00091249          |
| 281.75365333 | 0.01500598          |
| 286.3905245  | 0.0012989           |
| 300.39761924 | 0.06764115          |
| 358.22464437 | 0.10245338          |

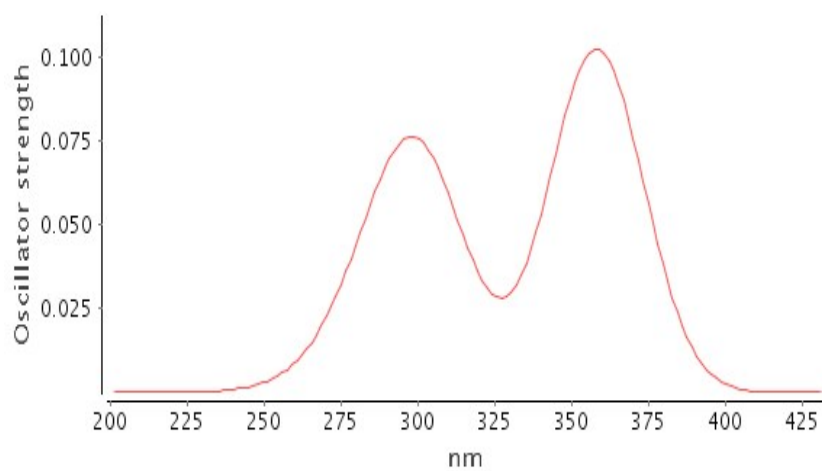

**Fig. S14** UV-Vis spectrum of fluorophoric unit of **PCP-1** obtained from TD-DFT

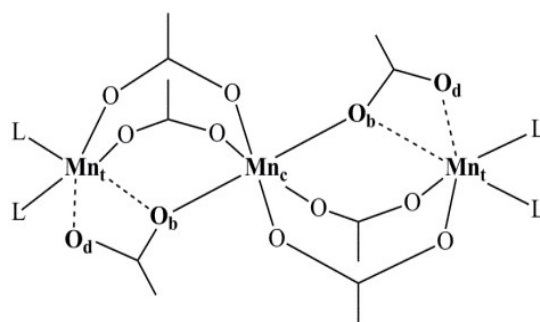

**Fig. S15** Schematic structure of trinuclear complexes with  $[Mn_3(\mu-RCOO)_6]$  core, showing the bridging mode of the caboxylato ligands.
